# Supplementary material
Source: publisher site journal article supplement (http://edge.sagepub.com/sites/default/files/AppendixF_1.pdf)
Supplement: Supplementary file 1 [file AppendixF_1.pdf]

## F: VA Supplement Web Resources

[http://www.virginia.gov/cmsportal3/government\\_4096/codes\\_and\\_laws.html](http://www.virginia.gov/cmsportal3/government_4096/codes_and_laws.html)

Virginia codes and laws, from the Official Web Site of the Commonwealth of Virginia.

<http://legis.state.va.us/Laws/CodeofVa.htm>

Code of Virginia, searchable by phrase, from the Virginia General Assembly. Also includes searchable database of Bills and Resolutions, links to Constitution of Virginia, Virginia Administrative Code, government web sites, and much more.

<http://www.vsp.state.va.us/>

Website for the Virginia State Police. Includes information on criminal record checks, “Facts and Figures” reports on law enforcement activity, the Virginia Freedom of Information Act, vehicle safety, and much more.

<http://www.courts.state.va.us/courtadmin/library/home.html>

Website of the Virginia State Law Library, a unit of the Virginia Supreme Court.

<http://www.law.virginia.edu/lawweb/lawweb2.nsf/pages/VaGov>

Information on the Virginia government from the University of Virginia School of Law. Includes many links on laws, government, courts, etc.

<http://www.findlaw.com/11stategov/va/index.html>

Primary materials, Federal resources, Virginia news and media, and other resources from FindLaw.

### Additional General Web Resources:

<http://www.llsdc.org/state-leg/>

Links to state laws, regulation, and legislatures from the Law Librarians’ Society of Washington, D.C.

[http://www.usa.gov/Agencies/State\\_and\\_Territories.shtml](http://www.usa.gov/Agencies/State_and_Territories.shtml)

Links to official state government websites.

<http://www.govspot.com/state/>

Links to various government resources for each state, such as census data, laws, departments and agencies.
